# Supplementary material
Source: HighWire-hosted journal article supplement (https://jnis.bmj.com/highwire/filestream/170188/field_highwire_adjunct_files/0/neurintsurg-2021-018353supp001_data_supplement.pdf)
Supplement: neurintsurg-2021-018353supp001_data_supplement.pdf [file neurintsurg-2021-018353supp001_data_supplement.pdf]

Table S1. Measured length and elongation of PED

|                                | <b>ML (mm)</b> | <b>Elongation (%)</b> |
|--------------------------------|----------------|-----------------------|
| Mean                           | 28.8           | 32.6                  |
| Range                          | 13.8-59.3      | -26.3-109.2           |
| <b>Labeled length of PED</b>   |                |                       |
| 14 mm                          | 22.5           | 60.4                  |
| 16 mm                          | 20.7           | 29.5                  |
| 18 mm                          | 24.6           | 36.4                  |
| 20 mm                          | 27.4           | 37.1                  |
| 25 mm                          | 31.1           | 24.4                  |
| 30 mm                          | 41.6           | 38.7                  |
| 35 mm                          | 47.1           | 34.6                  |
| <b>Labeled Diameter of PED</b> |                |                       |
| 2.5 mm                         | 20.3           | 12.9                  |
| 3 mm                           | 31.1           | 17.2                  |
| 3.25 mm                        | 30.6           | 22.6                  |
| 3.5 mm                         | 27.2           | 24.3                  |
| 3.75 mm                        | 29.0           | 28.9                  |
| 4 mm                           | 27.9           | 28.3                  |
| 4.25 mm                        | 30.3           | 42.9                  |
| 4.5 mm                         | 29.8           | 34.8                  |
| 4.75 mm                        | 29.5           | 40.2                  |
| 5 mm                           | 29.5           | 50.2                  |
| <b>Post-processing</b>         |                |                       |
| Yes                            | 31.7           | 37.3                  |
| No                             | 28.7           | 32.3                  |

Table S2. Calculated length and error of PED

|                                | CL (mm)   | Error (%) |
|--------------------------------|-----------|-----------|
| Mean                           | 29.0      | 6.6       |
| Range                          | 12.9-59.3 | 0.32-21.2 |
| <b>Labeled length of PED</b>   |           |           |
| 14 mm                          | 23.3      | 3.7       |
| 16 mm                          | 20.9      | 5.2       |
| 18 mm                          | 24.8      | 7.7       |
| 20 mm                          | 27.8      | 6.5       |
| 25 mm                          | 31.4      | 6.8       |
| 30 mm                          | 40.2      | 8.6       |
| 35 mm                          | 47.9      | 5.9       |
| <b>Labeled diameter of PED</b> |           |           |
| 2.5 mm                         | 20.0      | 1.4       |
| 3 mm                           | 33.6      | 10.7      |
| 3.25 mm                        | 29.1      | 4.9       |
| 3.5 mm                         | 27.1      | 7.6       |
| 3.75 mm                        | 28.8      | 5.9       |
| 4 mm                           | 28.0      | 6.9       |
| 4.25 mm                        | 30.4      | 6.4       |
| 4.5 mm                         | 30.4      | 6.7       |
| 4.75 mm                        | 29.0      | 6.3       |
| 5 mm                           | 30.8      | 6.6       |
